# Supplementary material for: Combination of Probiotics and Salvia miltiorrhiza Polysaccharide Alleviates Hepatic Steatosis via Gut Microbiota Modulation and Insulin Resistance Improvement in High Fat-Induced NAFLD Mice
Source: PubMed Central journal article supplement — Diabetes Metab J. 2019 Dec 3;44(2):336–48. doi: 10.4093/dmj.2019.0042 (PMC7188963; doi:10.4093/dmj.2019.0042), 2019-12-03
Supplement: dmj-44-336-s001.pdf [file dmj-44-336-s001.pdf]

**Supplementary Table 1.** Primers used for mRNA detection

|               | Forward (5'-3')       | Reverse (5'-3')       |
|---------------|-----------------------|-----------------------|
| TNF- $\alpha$ | AAGCCTGTAGCCCACGTC    | CACCACTAGTTGGTTGTCTT  |
| IL-1 $\beta$  | GCCCATCCTCTGTGACTCAT  | AGG CCACAGGTATTTTGTCG |
| GAPDH         | ACCACAGTCCATGCC ATCAC | TCCACCACCCTGTTG CTGTA |
| IL-6          | GATGGATGCTACCAAACCTGG | AGCATTGGAAAT'TGGGGTA  |

Relative mRNA levels were normalized to the GAPDH level.

TNF- $\alpha$ , tumor necrosis factor  $\alpha$ ; IL-1 $\beta$ , interleukin 1 $\beta$ ; GAPDH, glyceraldehyde 3-phosphate dehydrogenase; IL-6, interleukin 6.
