# Supplementary material for: Combination of Probiotics and Salvia miltiorrhiza Polysaccharide Alleviates Hepatic Steatosis via Gut Microbiota Modulation and Insulin Resistance Improvement in High Fat-Induced NAFLD Mice
Source: PubMed Central journal article supplement — Diabetes Metab J. 2019 Dec 3;44(2):336–48. doi: 10.4093/dmj.2019.0042 (PMC7188963; doi:10.4093/dmj.2019.0042), 2019-12-03
Supplement: dmj-44-336-s002.pdf [file dmj-44-336-s002.pdf]

**Supplementary Table 2.** Sequences of the primers used in the lipid metabolism gene detection

| Gene           | Forward (5'-3')        | Reverse (5'-3')        |
|----------------|------------------------|------------------------|
| SREBP-1c       | GCGGAGCCATGGATTGCAC    | CTCTTCCTTGATAACCAGGCC  |
| FAS            | AGCTGCCAGAGTCGGAGAAC   | TGTAGCCCACGAGTGTCTCG   |
| CPT-1a         | TGAGCGACTGGTGGGAGGAG   | GAGCCAGACCTTGAAGTAGCG  |
| SCD-1          | TCTTCCTTATCATTGCCAACAC | GCGTTGAGCACCAGAGTGTATC |
| PPAR $\alpha$  | CCAGTATTTAGGAAGCTGTCCT | CGTTGTGTGACATCCCGACAG  |
| ACC            | GGCCAGTGCTATGCTGAGAT   | AGGGTCAAGTGCTGCTCCA    |
| $\beta$ -Actin | GCAAGAGAGGCATCCTCACC   | CGTAGATGGGCACAGTGTGG   |

SREBP-1c, sterol regulatory element binding protein 1c; FAS, fatty acid synthase; CPT-1a, carnitine palmitoyltransferase-1a; SCD-1, stearoyl-CoA desaturase-1; PPAR $\alpha$ , peroxisome proliferator-activated receptor- $\alpha$ ; ACC, acetyl-CoA carboxylase.
